# Supplementary material
Source: Springer Nature journal article supplement (https://www.springermedizin.de/resource/supplementary/12865_2007_137_MOESM4_ESM.pdf/9428588)

Lung

Abomasum

Lymph node

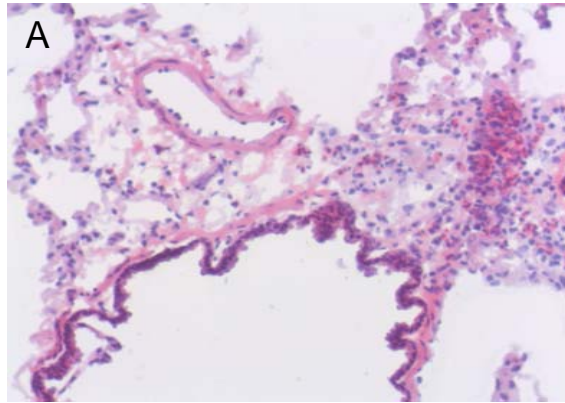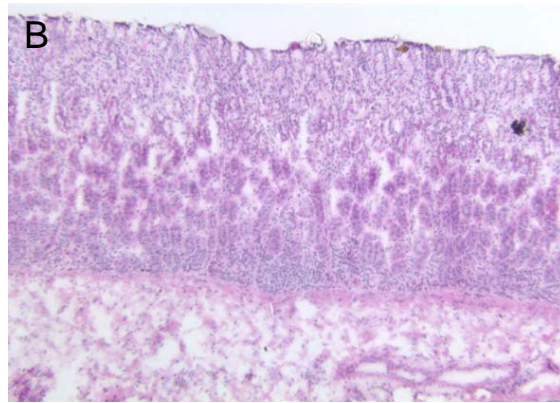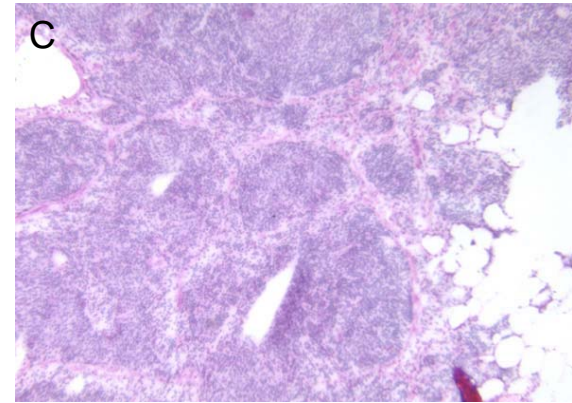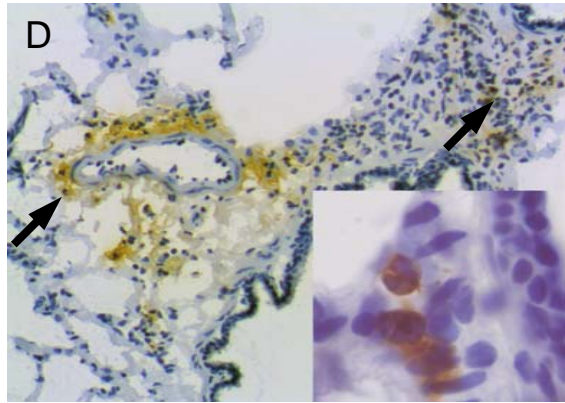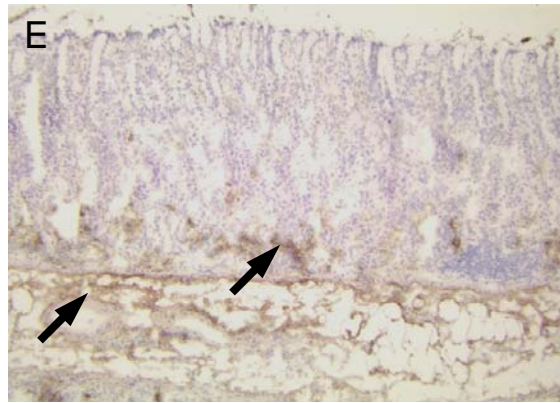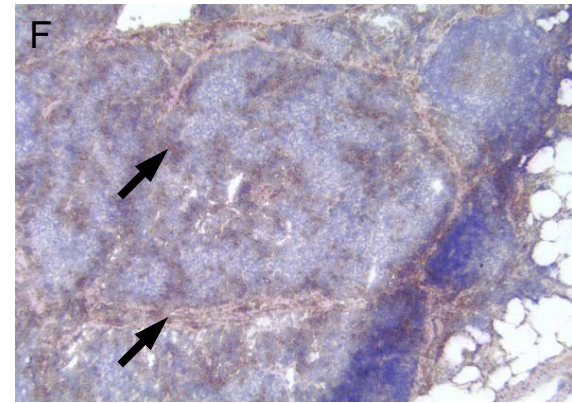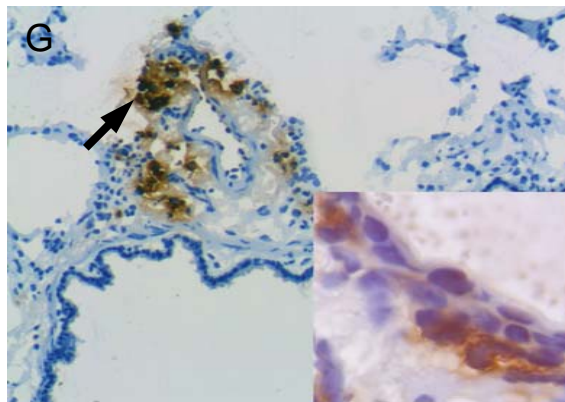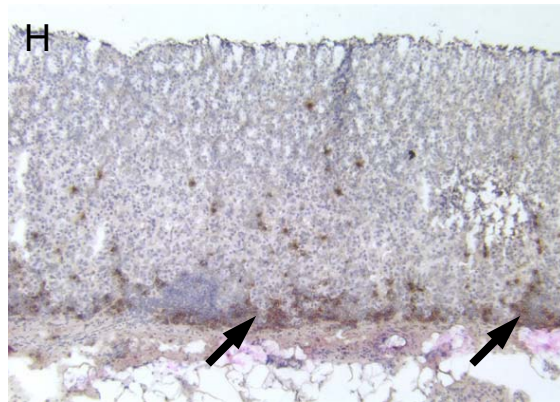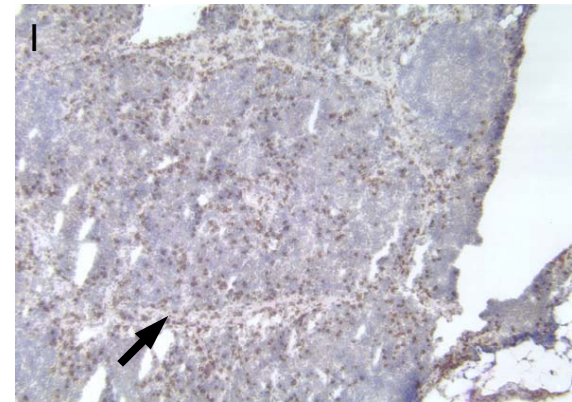

Supplement: MOESM4 [file 9428588]
